# Supplementary material for: The mitochondrial permeability transition pore is a dispensable element for mitochondrial calcium efflux
Source: PubMed Central journal article supplement (PMC4074345; doi:10.1016/j.ceca.2014.03.004), 2014-07
Supplement: mmc1.pdf [file mmc1.pdf]

# SUPPLEMENTARY FIGURE 1

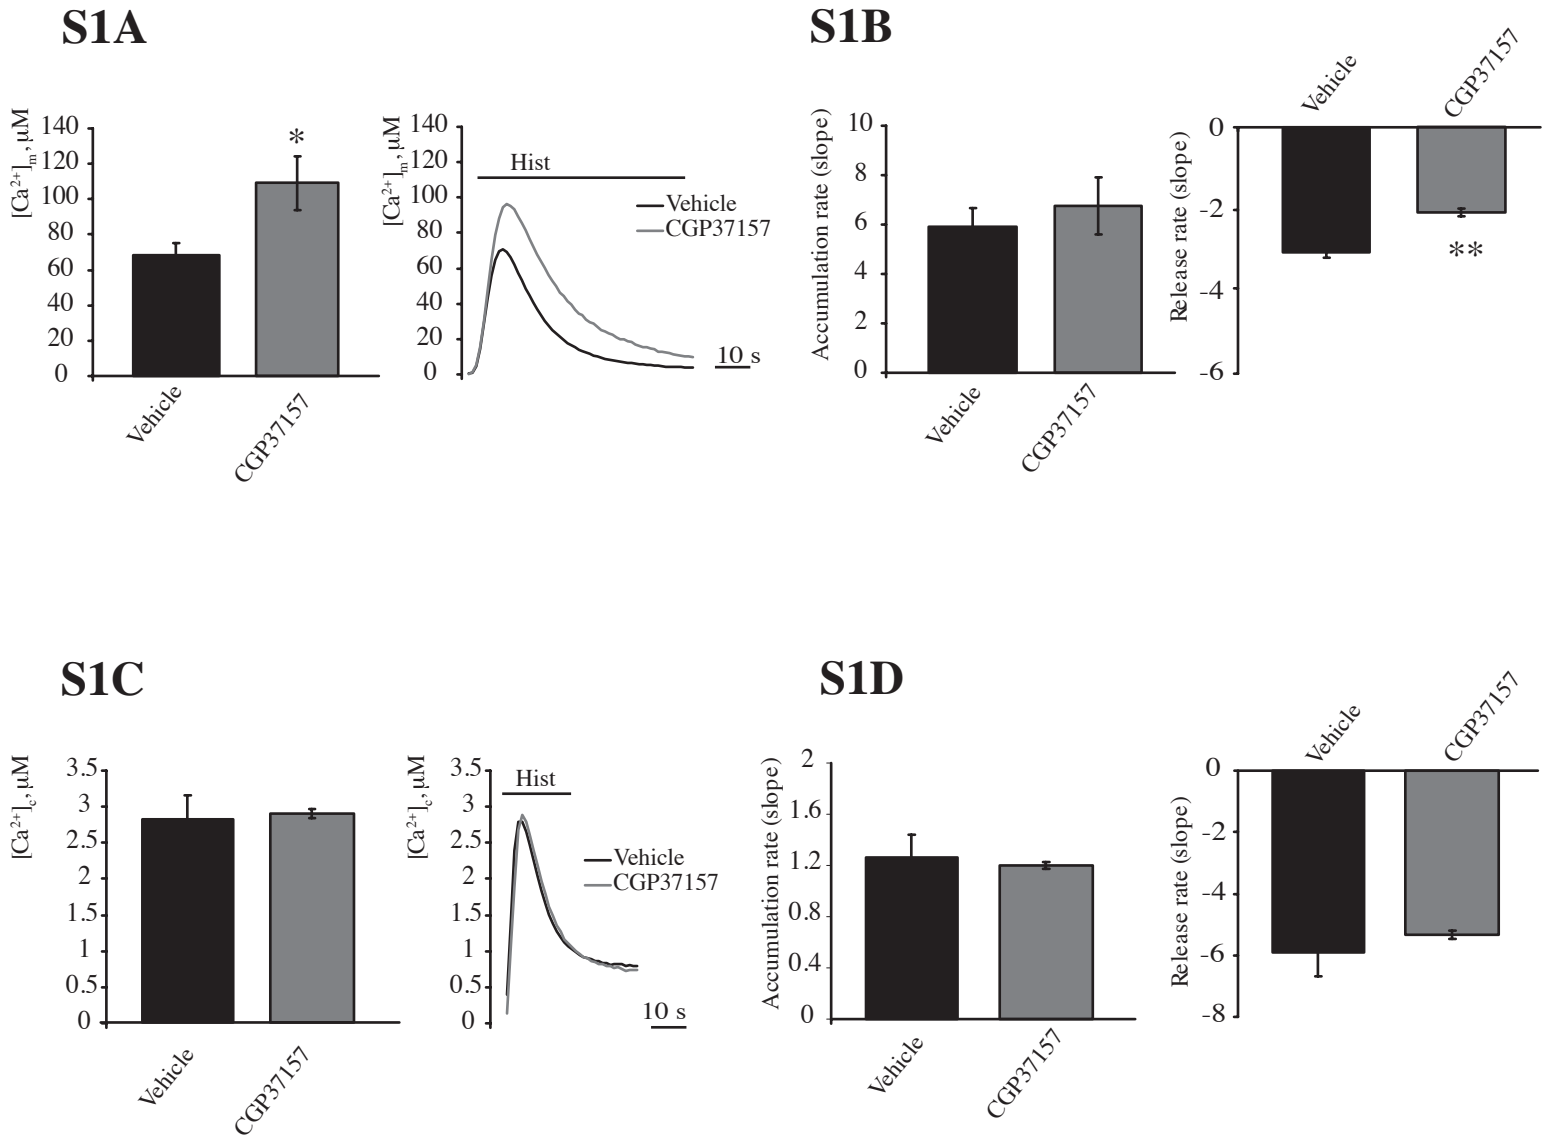

**SUPPLEMENTARY FIGURE. Inhibition of mitochondrial  $Ca^{2+}$  efflux by CGP37157.** HeLa cells were transfected with a plasmid coding for a mitochondrial (S1A and B; n=14, from 3 independent experiments) or cytosolic (S1C and S1D; n=10, from 3 independent experiments) aequorin and treated with 10 μM CGP37157 for 2 min. The cells were then stimulated with 100 μM histamine (Hist) in the continuous presence of the inhibitor.

Rates of mitochondrial (S1B) or cytosolic (S1D)  $Ca^{2+}$  accumulation and release. The data are presented as means ± SEM \*p < 0.05.
